# 1 **Prevalence and associated factors of suicidal ideation among** 2 **adolescents in rural Bangladesh**

3 Rifa Tamanna Mumu<sup>1¶</sup>, Md Parvez Shaikh<sup>2</sup> Dipak Kumar Mitra<sup>3</sup>

4 <sup>1</sup>Department of Public Health, School of Health and Life Science, North South University,  
5 Bashundhara, Dhaka, Bangladesh

6 <sup>2</sup>Industrial and Production Engineering, Shahjalal University of Science and Technology, Sylhet,  
7 Bangladesh

8 <sup>3</sup>Department of Public Health, School of Health and Life Science, North South University,  
9 Bashundhara, Dhaka, Bangladesh

10  
11 \*Corresponding author:

12 Email: [rifa.tamanna.sbmc@gmail.com](mailto:rifa.tamanna.sbmc@gmail.com) (RM)

## 13 14 **Author contribution**

15 Investigation, Methodology, Data curation, Formal analysis, and Resources: <sup>¶</sup> Rifa Tamanna  
16 Mumu

17 Writing (Original draft preparation, Review, and Editing): Md Parvez Shaikh

18 Conceptualization and supervision: Dipak Kumar Mitra

## 19 20 **Keywords**

21 Suicidal behavior, Adolescents, Rural Bangladesh, Adolescent mental health, Suicide, Mental  
22 health

## 24 **Abstract**

25 **Background:** Suicide ranks as the fourth most common cause of death globally, which is more  
26 pronounced in lower-middle-income countries. LMICs witness 88% of adolescent suicides  
27 yearly, with a 14% prevalence of suicidal ideation. A few studies are available based on the  
28 suicidal behavior of young adults residing in rural Bangladesh.

29 **Objective:** This study seeks to evaluate the prevalence and associated factors of suicidal ideation  
30 in 11 to 17-year-old adolescents in a remote subdistrict in Bangladesh.

31 **Method:** A cross-sectional study was performed in Lohagara, a rural subdistrict in Narail, in  
32 southern Bangladesh from April, 15 to May 14, 2024. 350 subjects were recruited for the study,  
33 all of whom were school-going adolescents aged 11 to 17 years. The Bengali-translated versions  
34 of the Suicidal Behavior-Revised Questionnaire (SBQ-R) and the Depression, Anxiety, and  
35 Stress Scale - 21 Items (DASS-21), as well as another structured questionnaire, were used to  
36 collect data from participants. Data analysis was done by STATA version 17.

37 **Result:** The prevalence of current suicidal ideation among adolescents is 21% (95% CI: 17% to  
38 25.8%). Smoking, lack of close friends, an unfavorable family environment, and depression were  
39 found to be significantly associated with the development of suicidal ideation in adolescents.  
40 Unmarried and single relationship status played a protective role in growing young adults'  
41 suicidal thoughts.

42 **Conclusion:** The notable prevalence of suicidal ideation in adolescents underscores the need for  
43 screening and intervention at an early age to protect them from dreadful consequences. By  
44 shedding light on this issue, different health promotional and educational programs, organized in  
45 schools and communities may help raise awareness in students, teachers as well as legal  
46 guardians. The ultimate goal is to safeguard adolescents from making devastating decisions with  
47 adequate counseling, care, and support.

48

## 49 **Introduction**

50 Annually, around 703 individuals are succumbing to suicide globally, as reported by the World  
51 Health Organization. Notably, the rate of adolescent suicide is 88% in lower-middle-income  
52 countries like Bangladesh, where 90% of the world's preadults reside. In the year 2019, suicide  
53 ranked as the fourth preeminent cause of death among 15 to 29 aged individuals. Statistics  
54 unveil a 9.5% worldwide suicide rate in males and 4.18% in females in the 15 to 19 years age  
55 bracket in 2009 with a greater susceptibility in elderly adolescents, males in particular (2).

56 A study conducted with 12 to 17-year-old young adults from 82 lower-middle-income countries  
57 revealed a 14% prevalence of suicidal ideation. It was higher in African regions (21%) and lower  
58 in Asian regions (8%). Several factors, including female gender, older age, lower socio-  
59 economic status, lack of close friendships, overprotective parenting, peer conflicts, isolation, and  
60 victimization, were notably associated with anxiety and suicidal ideation among adolescents (3).  
61 Brazil showed a similar trend, where 11 to 15-year-olds manifested a 14.1% prevalence of  
62 suicidal ideation, and associated factors included female gender, substance use, conduct  
63 disorders, and depressive symptoms (4). On the other hand, a 21.6% prevalence was evaluated  
64 including 21.3% in males and 23.5% in females among rural adolescents in Uganda (5).

65 In the context of Bangladesh, a comparatively reduced suicide rate can be observed in city  
66 dwellers than in country people. Adolescents, the elderly, and rural inhabitants are more  
67 susceptible to suicide, the adolescent suicide rate is found 20.1% in rural Bangladesh (6). 5%  
68 lifetime suicidal ideation is detected among 14 to 19-year-old country adolescents in Bangladesh,  
69 revealed in a study conducted in 2013 (7). The prevalence of suicidal ideation among university  
70 students was 13.8% which is influenced by gender, academic year, socioeconomic status,  
71 depression, family history of suicide, and exposure to traumatic events (8). Among 18 to 28-  
72 year-olds 12.8% rate of suicidal ideation rate was determined during the early-COVID-19 period,  
73 where the risk factors encompassed previous suicidal attempts, family history, sleep issues,  
74 depression, anxiety, and stress (9).

75 Research carried out with the Global School-based Health Survey data in Bangladesh (2014)  
76 visualized an 11.7% prevalence of suicidal behavior in school-going young adults aged 11 to 18  
77 years. Associated factors included loneliness, bullying, a lack of close friendships, anxiety,  
78 substance abuse, participating in sexual activity, experiencing a deficit of parental oversight in  
79 homework checking, and sparse peer support (10). Although several investigations in

80 Bangladesh have been conducted to explore adolescent suicidal ideation, the concentration has  
81 predominantly been on university students, which has created a gap in reckoning the situation  
82 among school-going rural adolescents. Hence, this study aims to evaluate the prevalence and  
83 associated factors of suicidal ideation in 11 to 17-year-old adolescents in a rural sub-district in  
84 Bangladesh. The knowledge of the current rates and associated factors may help stakeholders  
85 and policymakers make appropriate decisions and actions to raise awareness to safeguard  
86 adolescents' mental well-being and protect them from making devastating decisions.

87

## 88 **Method**

### 89 **Study Design**

90 A cross-sectional study was conducted between April 15 and May 14, 2024, at Lohagara  
91 Government Pilot High School, Lohagara, Narail to assess the prevalence of suicidal ideation  
92 and the factors associated with its development among adolescents in Lohagara, a rural sub-  
93 district in Bangladesh.

94

### 95 **Study Participants**

96 The target population was adolescents aged 11 to 17 years in Lohagara and the sample  
97 population was the students studying at Lohagara Government Pilot High School, a high school  
98 in Lohagara.

99

### 100 **Study Period**

101 The study was conducted from April 15 to May 15, 2024.

102

### 103 **Sample Size**

104 Considering the prevalence of suicidal behavior among adolescents in Bangladesh is 11.7%  
105 according to a study conducted using the Global School-based Survey data of 2014 (10), 95%  
106 confidence interval, and a 4% margin of error,

107 calculated sample size,  $n = (1.96)^2 * \frac{0.12(1-0.12)}{(0.04)^2} = 254$

108 The sampling technique was stratified sampling. Students from different classes were grouped  
109 into sections. There were five classes, and each class consisted of three different sections. Every  
110 section comprised fifty students in total. Through simple random sampling, one section from  
111 each class was selected primarily, and another two sections were chosen from the rest following  
112 the same.

113

## 114 **Data Collection Tools**

115 The persistence of suicidal ideation was determined by the Bengali-translated version of the  
116 Suicidal Behavior-Revised Questionnaire (SBQ-R), which consists of four questions scoring  
117 from 3 to 18. The first question of this questionnaire was used to assess lifetime suicidal ideation.

118 The Depression, Anxiety, and Stress Scale-21 Items (DASS-21) was used to assess  
119 psychological factors like the level of anxiety, depression, and stress. Another structured  
120 questionnaire was used to collect data on participants' sociodemographic, behavioral, socio-  
121 environmental, institutional, and family-environmental factors. Data were collected from  
122 respondents translating all questionnaires into the Bengali language. The overall questionnaire  
123 was tested on some target population rather than the study participants and the necessary changes  
124 were made before data collection.

125

## 126 **Data Management & Analysis**

127 The data for the study was analyzed by STATA version 17. An Independent sample t-test was  
128 performed to compare the mean between the two groups and Pearson's chi-square test was

129 performed to find out the possible association of sociodemographic, behavioral, psychological,  
130 family-environmental, institutional, and socio-environmental factors with adolescent suicidal  
131 thoughts. To adjust the confounding factors, a multivariate analysis using multinomial logistic  
132 regression was performed. Adjusted and unadjusted odds ratios and their 95% CI were used as  
133 indicators strength of the association.

134

## 135 **Ethical Considerations**

136 Ethical permission was taken from the Scientific Review Committee(SRC) and Institutional  
137 Ethics Committee of North South University before data collection. A permission letter was  
138 obtained from the school authorities. Informed written consent was taken from the legal  
139 guardians of students before data collection. The respondents were assured of the confidentiality  
140 of information. They were also informed that this data would be used for study purposes only.

141

## 142 **Result**

### 143 **Sociodemographic characteristics of adolescents**

144 A total of 350 data was collected from adolescents with 11 to 17 years of age brackets with a  
145 mean age of 14 years (95% CI: 13.8-14.2) from a school in Lohagara. The response rate was  
146 97.4%. More than half of the participants (55.7%) were aged between 11 to 14 years and  
147 considered younger adolescents and the rest (44.3%) were comparatively older adolescents aged  
148 15 to 17 years. The proportion of male and female apprentices was almost equal; 51.6% (175)  
149 were female and 48.4% (164) were male. Considering the perspectives of monthly family  
150 income, the number of family members, house ownership, and parents' occupations, around half  
151 of the participants (48.7%) belonged to families of medium socioeconomic status. 23.8% (81),  
152 and 27.5% (94) came from families with high and low socioeconomic status respectively. Most  
153 of the students were religiously Muslim; 15% (50) belonged to the Hindu community. A small  
154 percentage (4%) were engaged in part-time work apart from study. 78.7% (266) of students were  
155 living with their parents, whereas 17.5% (59) were with either father or mother, and 3.9% (13)  
156 were without parents. Only 8% (27) of the total had step-parents. A greater portion of students

157 (92%) were unmarried and single. Among the rest, 4.5% (15) were carrying on a good  
158 relationship, 2.7% (9) were enduring a complex relationship, and 2 (0.6%) students were married  
159 **Table I.**

160

## 161 **Behavioral factors of adolescents**

162 2% (7) of adolescents were smokers. 95% (321) used the internet not more than three hours a  
163 day. 3.6% (12) used moderately and stayed connected to the internet for 3-16 hours, whereas,  
164 1.2% (4), were regarded as heavy users, who utilized the internet over sixteen hours. Almost half  
165 (49%) of students were involved in regular extra-curricular activities **Table I.**

166

## 167 **Psychological characteristics of adolescents**

168 The Depression Anxiety Stress Scale-21 (DASS-21) was used to assess the level of anxiety,  
169 depression, and stress of participants. According to the obtained score, 90% (327) of adolescents  
170 weren't dominated by stress. The percentages of mild and moderate stress among pre-adults were  
171 7% (24) and 2.9% (10). There was no one found to have severe or extremely severe stress. The  
172 rates of mild, moderate, and severe anxiety were 7.6% (26), 7.6% (26), and 2.6% (9)  
173 respectively. Meanwhile, 82% (280) had minimal or no anxiety. The percentage of students free  
174 from depression was also 82% (280). Among the rest, 11% (38) were enduring mild, 6.5% (22)  
175 moderate, and 0.3% (1) severe depression. **Table I.**

176

## 177 **Institutional factors of adolescents**

178 11.1% of students reported that they didn't bear any academic stress, while moderate educational  
179 stress clutched a large portion (76.2%). However, 12.7% (43) experienced it vigorously. Among  
180 the participants, 62.9% (214) were complacent with their academic grades, whereas 37.1% (126)  
181 were not. The academic atmosphere appeared supportive to 92.3% (312) of students, meanwhile,  
182 6.2% reported that they received moderate encouragement from their teachers, and 1.2% (5)  
183 perceived the institutional environment as absolutely unsupportive. 12.4% (42) of students were

184 undergoing a dearth of close friendships. No peer conflict was experienced by 71.6% (242) of  
185 young adults at school. In contrast, 26% (88) encountered moderate, and 2.4% (8) grappled with  
186 severe disputes. **Table I.**

187

## 188 **Family-environmental factors of adolescents**

189 Slightly more than three-fourths (77.4%) of adolescents maintained good relationships with their  
190 parents. However, 20.9% (71) had moderate and 1.76% (6) endured strained parental  
191 relationships. 75.6% (257), 23.2% (79), and 1.2% (4) reported observing good, moderate, and  
192 extreme relationships between their family members respectively. 81.8% (279) of students stated  
193 having overprotective parents, and 16.7% (57) found their parents moderately concerning.  
194 Moreover, 1.5% (5) of students reported that their parents were perfunctory to their studies and  
195 homework. More than half (64.2 %) of the students didn't experience any sort of domestic  
196 violence. On the contrary, 32.8% (112) of adolescents provided the information of being beaten  
197 by guardians sporadically, and 2.9% (10) experienced it habitually. However, 5% (17) of  
198 participants had family histories of committing or attempting suicide **Table I.**

199

## 200 **Socio-environmental factors of adolescents**

201 15.7% (53) of students were victims of bullying by classmates, teachers, family members,  
202 relatives, or neighbors **Table I.**

203

## 204 **Prevalence of suicidal ideation among adolescents**

205 The first question of the Suicidal Behavior-Revised Questionnaire (SBQ-R) was used to evaluate  
206 the rate of lifetime suicidal ideation among adolescents. The mean SBQ-R score was 4.7 (95%  
207 CI: 4.3-5). 21% (95% CI: 17% to 25.8%) (72) of students were found to have lifetime suicidal  
208 ideation after analysis. **Table I.**



209 **Table 1. Characteristics of 11 to 17-year-old adolescents in Lohagara (a rural subdistrict in**  
 210 **Bangladesh), 2024.**

| Variables                                  | Category             | Number (n) | Percentage (%) |
|--------------------------------------------|----------------------|------------|----------------|
| <b>Sociodemographic</b>                    |                      |            |                |
| Age                                        | 11-13 years          | 115        | 33.7           |
|                                            | 13-17 years          | 226        | 66.3           |
| Gender                                     | Male                 | 164        | 48.4           |
|                                            | Female               | 175        | 51.6           |
| Occupational involvement besides the study | Involved             | 13         | 4.1            |
|                                            | Not involved         | 302        | 95.9           |
| Religion                                   | Hindu                | 50         | 14.7           |
|                                            | Muslim               | 290        | 85.3           |
|                                            | Others               | 0          | 0              |
| Number of family members                   | 4 or less            | 173        | 50.7           |
|                                            | More than 4          | 168        | 49.3           |
| Socioeconomic status                       | Low                  | 94         | 27.5           |
|                                            | Medium               | 166        | 48.7           |
|                                            | High                 | 81         | 23.8           |
| House ownership of parents                 | Yes                  | 292        | 87.6           |
|                                            | No                   | 41         | 12.3           |
| Monthly family income (BDT)                | >20,000              | 166        | 49.9           |
|                                            | 10,000-20,000        | 102        | 30.6           |
|                                            | <10,000              | 65         | 19.5           |
| Living with parents                        | Both                 | 266        | 78.7           |
|                                            | Single parent        | 59         | 17.5           |
|                                            | Without parents      | 13         | 3.9            |
| Relationship status                        | Unmarried and single | 309        | 92.2           |
|                                            | In a relationship    | 15         | 4.5            |
|                                            | Complex              | 9          | 2.7            |
|                                            | Married              | 2          | 0.6            |
| Step-parents                               | Have                 | 27         | 8              |
|                                            | Do not have          | 311        | 92             |
| <b>Behavioral</b>                          |                      |            |                |
| Smoking                                    | Yes                  | 7          | 2.1            |
|                                            | No                   | 331        | 97.9           |
| Internet use                               | <3 hours             | 321        | 95.3           |
|                                            | 3-16 hours           | 12         | 3.5            |
|                                            | >16 hours            | 4          | 1.2            |
| Extracurricular activities                 | Involved             | 165        | 49.3           |
|                                            | Not involved         | 170        | 50.7           |
| <b>Institutional</b>                       |                      |            |                |
| Having friends                             | No                   | 297        | 87.6           |
|                                            | Yes                  | 42         | 12.4           |
| Educational stress                         | No stress            | 38         | 11.2           |

|                                      |                      |                       |          |          |
|--------------------------------------|----------------------|-----------------------|----------|----------|
|                                      |                      | Moderate              | 259      | 76.2     |
|                                      |                      | Severe                | 43       | 12.6     |
| Peer conflict                        |                      | No                    | 242      | 71.6     |
|                                      |                      | Moderate              | 88       | 26       |
|                                      |                      | Severe                | 8        | 2.4      |
| Grades                               |                      | Satisfactory          | 214      | 62.9     |
|                                      |                      | Unsatisfactory        | 126      | 37.6     |
| Teacher support                      |                      | Good                  | 312      | 92.3     |
|                                      |                      | Moderate              | 21       | 6.2      |
|                                      |                      | Poor                  | 5        | 1.5      |
| <b>Family-environmental</b>          |                      |                       |          |          |
| Relationship with parents            |                      | Good                  | 263      | 77.4     |
|                                      |                      | Moderate              | 71       | 20.9     |
|                                      |                      | Poor                  | 6        | 1.7      |
| Relationships between family members |                      | Good                  | 257      | 75.6     |
|                                      |                      | Moderate              | 79       | 23.2     |
|                                      |                      | Poor                  | 4        | 1.2      |
| Overprotective parents               |                      | Yes                   | 279      | 81.8     |
|                                      |                      | Moderately protective | 57       | 16.7     |
|                                      |                      | No                    | 5        | 1.5      |
| Domestic violence                    |                      | Not at all            | 219      | 64.2     |
|                                      |                      | Moderate              | 112      | 32.8     |
|                                      |                      | Severe                | 10       | 2.9      |
| Family history of suicide            |                      | Yes                   | 17       | 5        |
|                                      |                      | No                    | 321      | 95       |
| <b>Socio-environmental</b>           |                      |                       |          |          |
| Bullying                             |                      | Yes                   | 285      | 84.3     |
|                                      |                      | No                    | 53       | 15.6     |
| <b>Psychological</b>                 | <b>DASS-21 score</b> | <b>Category</b>       | <b>n</b> | <b>%</b> |
| Stress                               | 0-14                 | No stress             | 307      | 90       |
|                                      | 15-18                | Mild                  | 24       | 7.1      |
|                                      | 19-25                | Moderate              | 10       | 2.9      |
|                                      | 26-33                | Severe                | 0        | 0        |
|                                      | 34+                  | Extremely severe      | 0        | 0        |
| Anxiety                              | 0-7                  | No anxiety            | 280      | 82.1     |
|                                      | 8-9                  | Mild                  | 26       | 7.6      |
|                                      | 10-14                | Moderate              | 26       | 7.6      |
|                                      | 15-20                | Severe                | 9        | 2.6      |
|                                      | 20+                  | Extremely severe      | 0        | 0        |
| Depression                           | 0-9                  | No depression         | 280      | 82.1     |
|                                      | 10-13                | Mild                  | 38       | 11.1     |
|                                      | 14-20                | Moderate              | 22       | 6.5      |
|                                      | 21-27                | Severe                | 1        | 0.3      |
|                                      | 28+                  | Extremely severe      | 0        | 0        |
| <b>Suicidal ideation</b>             |                      | Yes                   | 72       | 21.1     |

|  |    |     |      |
|--|----|-----|------|
|  | No | 269 | 78.9 |
|--|----|-----|------|

211

212 **Associated factors of suicidal ideation among adolescents**

213 Sociodemographic, behavioral, psychological, institutional, family-environmental, and socio-  
 214 environmental factors were used to identify the associated factors of suicidal ideation among  
 215 adolescents. Age, living with parents, relationship status, step-parents, smoking, close friends,  
 216 peer conflict, peer isolation, educational stress, grades, bullying, the relationship with parents,  
 217 the relationship between family members, overprotective parents, family history of suicide,  
 218 stress, anxiety, and depression were found statistically significant with a p-value of <0.05 in chi-  
 219 square test. These variables were further analyzed through a multivariate analysis using  
 220 multinomial logistic regression to adjust the confounding factors.

221 **Table 2. Factors associated with suicidal ideation among students of 11 to 17 years in**  
 222 **Lohagara (a rural subdistrict in Bangladesh), 2024 (bivariate analysis by chi-squared test**  
 223 **and multivariate analysis by multiple logistic regression).**

| Variables                       | Category             | Suicidal ideation |              | Chi2 p-value | p-value after multivariate analysis |
|---------------------------------|----------------------|-------------------|--------------|--------------|-------------------------------------|
|                                 |                      | Yes               | No           |              |                                     |
| <b>Sociodemographic factors</b> |                      |                   |              |              |                                     |
| Age                             | 11-13 years          | 21<br>11.1%       | 169<br>88.9% | <0.001       | Reference                           |
|                                 | 13-17 years          | 51<br>33.8%       | 100<br>66.2% |              | 0.132                               |
| Living with parents             | Both parents         | 49<br>18.4%       | 217<br>81.6% | <0.001       | Reference                           |
|                                 | Single parent        | 19<br>32.2%       | 40<br>67.8%  |              | 0.269                               |
|                                 | Without parent       | 4<br>30.8%        | 9<br>69.2%   |              | 0.63                                |
| <b>Relationship status</b>      | Unmarried and single | 54<br>17.4%       | 256<br>82.5% | <0.001       | <b>0.004</b>                        |
|                                 | In a relationship    | 12<br>75%         | 4<br>25%     |              | 0.691                               |
|                                 | Complex              | 5<br>25%          | 6<br>75%     |              | Reference                           |
|                                 | Married              | 1<br>45.5%        | 3<br>54.5%   |              | 0.802                               |
| Step-parents                    | Have                 | 13<br>48.2%       | 14<br>51.8%  | <0.001       | 0.285                               |

|                                             |                       |             |              |        |              |
|---------------------------------------------|-----------------------|-------------|--------------|--------|--------------|
|                                             | Do not have           | 59<br>19%   | 252<br>81%   |        | Reference    |
| <b>Behavioral factors</b>                   |                       |             |              |        |              |
| <b>Smoking</b>                              | No                    | 65<br>19.6% | 266<br>80.4% | 0.001  | Reference    |
|                                             | Yes                   | 5<br>71.4%  | 2<br>28.6%   |        | <b>0.024</b> |
| <b>Institutional factors</b>                |                       |             |              |        |              |
| <b>Having close friends</b>                 | No                    | 18<br>42.9% | 24<br>57.1%  | <0.001 | Reference    |
|                                             | Yes                   | 54<br>18.2% | 243<br>81.8% |        | <b>0.026</b> |
| Peer conflict                               | No                    | 41<br>16.9% | 201<br>83.1% | 0.007  | 0.956        |
|                                             | Moderate              | 29<br>32.9% | 59<br>67.1%  |        | Reference    |
|                                             | Severe                | 2<br>25%    | 6<br>75%     |        | <b>0.014</b> |
| Peer isolation                              | No                    | 30<br>15%   | 170<br>85%   | 0.001  | 0.331        |
|                                             | Moderate              | 34<br>27.9% | 88<br>72.1%  |        | Reference    |
|                                             | Severe                | 8<br>44.4%  | 10<br>55.6%  |        | 0.571        |
| Grades                                      | Satisfactory          | 26<br>12.2% | 188<br>87.8% | <0.001 | 0.511        |
|                                             | Unsatisfactory        | 45<br>35.7% | 81<br>64.3%  |        | Reference    |
| Educational stress                          | No                    | 9<br>63.7%  | 29<br>76.3%  | 0.017  | 0.998        |
|                                             | Moderate              | 47<br>18.2% | 212<br>81.8% |        | Reference    |
|                                             | Severe                | 16<br>37.2% | 27<br>62.8%  |        | 0.325        |
| <b>Family-environmental factors</b>         |                       |             |              |        |              |
| Relationship with parents                   | Good                  | 37<br>14.1% | 226<br>85.9% | <0.001 | Reference    |
|                                             | Moderate              | 30<br>42.2% | 41<br>57.8%  |        | 0.321        |
|                                             | Poor                  | 5<br>83.3%  | 1<br>16.7%   |        | 0.651        |
| <b>Relationships between family members</b> | Good                  | 34<br>13.2% | 223<br>86.8% | <0.001 | Reference    |
|                                             | Unfavorable           | 35<br>44.3% | 44<br>55.8%  |        | <b>0.003</b> |
|                                             | Extremely unfavorable | 2<br>50%    | 2<br>50%     |        | 0.698        |
| Overprotective                              | Yes                   | 49          | 230          | 0.001  | 0.847        |

|                                    |                       |             |              |        |              |
|------------------------------------|-----------------------|-------------|--------------|--------|--------------|
| parents                            |                       | 17.6%       | 82.4%        |        |              |
|                                    | Moderately protective | 20<br>35.1% | 37<br>64.9%  |        | Reference    |
|                                    | No                    | 3<br>60%    | 2<br>40%     |        | 0.98         |
| Family history of suicide          | Yes                   | 10<br>58.8% | 7<br>41.2%   | <0.001 | 0.081        |
|                                    | No                    | 62<br>19.3% | 259<br>80.7% |        | Reference    |
| <b>Socio-environmental factors</b> |                       |             |              |        |              |
| Bullying                           | Yes                   | 29<br>54.7% | 42<br>14.7%  | <0.001 | 0.274        |
|                                    | No                    | 24<br>45.3% | 243<br>85.3% |        | Reference    |
| <b>Psychological factors</b>       |                       |             |              |        |              |
| Stress                             | No stress             | 49<br>16%   | 258<br>84%   | <0.001 | Reference    |
|                                    | Mild                  | 15<br>62.5% | 9<br>37.5%   |        | 0.255        |
|                                    | Moderate              | 8<br>80%    | 2<br>20%     |        | 0.344        |
| Anxiety                            | No anxiety            | 41<br>14.6% | 239<br>85.4% | <0.001 | Reference    |
|                                    | Mild                  | 10<br>38.5% | 16<br>61.5%  |        | 0.66         |
|                                    | Moderate              | 15<br>57.7% | 11<br>42.3%  |        | 0.101        |
|                                    | Severe                | 6<br>66.7%  | 3<br>33.3%   |        | 0.936        |
| <b>Depression</b>                  | No Depression         | 38<br>13.6% | 242<br>86.4% | <0.001 | Reference    |
|                                    | Mild                  | 17<br>44.7% | 21<br>55.3%  |        | <b>0.02</b>  |
|                                    | Moderate              | 16<br>76.2% | 5<br>23.8%   |        | <b>0.014</b> |
|                                    | Severe                | 1<br>50%    | 1<br>50%     |        | 0.298        |

224 Relationship status, smoking, having close friends, unfavorable family environment, and mild to  
225 moderate depression were found to be significantly associated with the development of suicidal  
226 ideation in preadults. Unmarried and single relationship status was negatively associated with  
227 this thought. However, it was the highest among married adolescents (45.5%). In contrast, 75%  
228 (9) of adolescents, who were in a relationship and 25% (2), who were overburdened by a  
229 complex relationship conveyed suicidal attitudes. Smoking also acted as a conducive factor for

230 the development of suicidal ideation. 71.4% of students who smoked regularly, generated a  
231 lifetime suicidal thought. Having close friends played a pivotal role in deterring suicidal ideation  
232 in young adults. Meanwhile, 42.9% of participants, who were feeling a desideratum of close  
233 friendships grew suicidal thoughts. On the other hand, 44% of adolescents, enduring an  
234 unfavorable family environment because of the poor relationships between family members  
235 developed suicidal ideation. Depression was revealed as a significantly associated factor and  
236 students experiencing depression were prone to develop suicidal thoughts. The percentage of  
237 adolescents having suicidal ideation who were suffering from mild and moderate depression was  
238 44.7% and 76.2% respectively. *Table 2.*

239

## 240 **Discussion**

241 This study aimed to assess the prevalence and associated factors of developing suicidal ideation  
242 among adolescents in rural Bangladesh. The point prevalence of lifetime suicidal ideation in  
243 rural adolescents is detected as 21% (95% CI: 17% to 25.8%). This percentage is attributed to a  
244 significant sociodemographic factor like relationship status. Smoking is an important behavioral  
245 factor associated with the development of suicidal thoughts in school-going adolescents.  
246 Depression, a noteworthy psychological factor is also conducive to the generation of this in 11 to  
247 17-year-olds. In addition, an unfavorable family environment works as a crucial family-  
248 environmental factor in suicidal thought generation in this age bracket. On the other hand, having  
249 close friends, an institutional factor plays a pivotal role in nullifying the suicidal ideation of rural  
250 adolescents.

251 The obtained 21% prevalence from this study aligns with the 21.6% prevalence in school-going  
252 adolescents in rural Uganda (5), 20% prevalence among Korean adolescents (11), and 20.1%  
253 (95% CI: 12.6-31.7) in rural Bangladeshi adolescents (6), whereas somewhat greater than the  
254 global prevalence (14%) of suicidal ideation among 12 to 17-year-olds (3) and the prevalence in  
255 Brazilian adolescents (14.1%) (4). The probable cause might be the difference in methodology,  
256 location, and sample sizes. The evaluated result from this research is also higher than the  
257 research conducted by Khan et. al unveiling an 11.7% prevalence of suicidal behavior among 11  
258 to 18-year-old adolescents in Bangladesh (10) and the probable cause can be the antecedent

259 research evaluated the overall suicidal behavior, while the current one is targeted to find out the  
260 prevalence of suicidal ideation only. However, the result of this study is distant from the study  
261 conducted by Begum et. al, which revealed 5% of suicidal ideation among 14 to 19-year-olds in  
262 rural Bangladesh (7), and that is probably due to the variation in time and age groups.

263 Married, promised-to-get-married, or those who have received marriage requests are more prone  
264 to generate suicidal thoughts than adolescent girls who haven't undergone the marriage process  
265 (12). This research depicts a significant association between relationship status and suicidal  
266 ideation in young adults; unmarried and single students are less likely to develop suicidal  
267 ideation at a young age.

268 Smoking enhances the chance of developing suicidal thoughts among preadults (13). In a study,  
269 Slomp et al. stated that female smokers have more likelihood of generating suicidal ideation (14).  
270 This study also states smoking is a contributing factor to developing this.

271 Lack of peer support has a decisive role in preadult suicidal thoughts development (10, 15). In a  
272 study, Biswas et. al highlighted the scarcity of close friends as a reinforcing factor for the  
273 development of suicidal behavior in adolescents (3). This study found a notable association  
274 between lack of close friendship and the generation of suicidal ideation in preadults.

275 Depression is revealed as a substantial psychological factor contributing to the growth of suicidal  
276 thoughts in young adults in many studies (4, 5, 16) and this study is in agreement with this.  
277 According to the current study, mild to moderate depression works as a crucial stimulator in  
278 suicidal ideation generation in adolescents.

279 Suicidal ideation can be developed due to a hostile family environment that is created by poor  
280 relationships between family members. Like this study, some other studies also showed an  
281 adverse family environment played a stimulating role in generating suicidal ideation in  
282 preadults(17, 18).

283 Some studies found significant associations between loneliness (19), bullying (20) anxiety(9, 10)  
284 stress(9), overprotective parents(21, 22), family history of suicide(23), and gender (5) with the  
285 development of suicidal tendencies in adolescents. This study doesn't find any considerable  
286 association with them, perhaps because of the distinction in age groups, locations, and sample  
287 sizes.

288

## 289 **Limitation**

290 This study was conducted with data collected from a specific school in an area because of the  
291 time and resource limitations. Though the school admission policy allows diversity, students  
292 from remote areas of Lohagara aren't inclined to get enrolled here. For this reason, this study  
293 doesn't fully capture the divergence of the community people and thus leaves a chance of  
294 generalizability bias.

295

## 296 **Conclusion**

297 However, about 2 in 10 students are developing suicidal ideation at an early age, which is a  
298 matter of concern. Further research with students from different locations in Bangladesh will  
299 help identify other associated or area-specific factors if available. Stakeholders and policy-  
300 makers should come forward to draft plans and policies to scale down the burden. The attitude  
301 and behavior of adolescents should be monitored carefully by their parents and teachers. Early  
302 screening and interventions are fundamental to protect them from making a dreadful decision. In  
303 addition, ensuring the participation of young adults in health promotional and health educational  
304 programs organized on this issue and increasing their creative opportunities may keep their  
305 mental health well and safeguard them from emerging suicidal tendencies at school age.

306

## 307 **Acknowledgment**

308 I am profoundly thankful to the Almighty for granting me the opportunity to pursue an MPH  
309 (Epidemiology) at North South University. I am also grateful to North South University for  
310 allowing me to do the research. I am greatly thankful to S M Hayatuzzaman, Headmaster,  
311 Lohagara Government Pilot High School Lohagara, Narail for his unwavering support to carry  
312 out the study.

313



## References

- 315 1. World Health Organization: Suicide worldwide in 2019: global health estimates. 2021.
- 316 2. Kölves K, De Leo D. Adolescent suicide rates between 1990 and 2009: Analysis of age group 15–  
317 19 years worldwide. *Journal of Adolescent Health*. 2016;58(1):69-77.
- 318 3. Biswas T, Scott JG, Munir K, Renzaho AM, Rawal LB, Baxter J, et al. Global variation in the  
319 prevalence of suicidal ideation, anxiety and their correlates among adolescents: a population based  
320 study of 82 countries. *EClinicalMedicine*. 2020;24.
- 321 4. Souza LDdM, Silva RAd, Jansen K, Kuhn RP, Horta BL, Pinheiro RT. Suicidal ideation in  
322 adolescents aged 11 to 15 years: prevalence and associated factors. *Brazilian Journal of Psychiatry*.  
323 2010;32:37-41.
- 324 5. Rudatsikira E, Muula AS, Siziya S, Twa-Twa J. Suicidal ideation and associated factors among  
325 school-going adolescents in rural Uganda. *BMC psychiatry*. 2007;7:1-6.
- 326 6. Mashreky SR, Rahman F, Rahman A. Suicide kills more than 10,000 people every year in  
327 Bangladesh. *Archives of Suicide Research*. 2013;17(4):387-96.
- 328 7. Begum A, Rahman AF, Rahman A, Soares J, Reza Khankeh H, Macassa G. Prevalence of suicide  
329 ideation among adolescents and young adults in rural Bangladesh. *International Journal of Mental*  
330 *Health*. 2017;46(3):177-87.
- 331 8. Rahman ME, Saiful Islam M, Mamun MA, Moonajilin MS, Yi S. Prevalence and factors associated  
332 with suicidal ideation among university students in Bangladesh. *Archives of suicide research*.  
333 2022;26(2):975-84.
- 334 9. Tasnim R, Islam MS, Sujan MSH, Sikder MT, Potenza MN. Suicidal ideation among Bangladeshi  
335 university students early during the COVID-19 pandemic: Prevalence estimates and correlates. *Children*  
336 *and youth services review*. 2020;119:105703.
- 337 10. Khan MMA, Rahman MM, Islam MR, Karim M, Hasan M, Jesmin SS. Suicidal behavior among  
338 school-going adolescents in Bangladesh: findings of the global school-based student health survey.  
339 *Social psychiatry and psychiatric epidemiology*. 2020;55:1491-502.
- 340 11. Park S, Kim J. Association between smoking and suicidal behaviors among adolescents in the  
341 Republic of Korea. *Journal of addictions nursing*. 2015;26(4):175-83.
- 342 12. Gage AJ. Association of child marriage with suicidal thoughts and attempts among adolescent  
343 girls in Ethiopia. *Journal of Adolescent Health*. 2013;52(5):654-6.
- 344 13. McGee R, Williams S, Nada-Raja S. Is cigarette smoking associated with suicidal ideation among  
345 young people? *American Journal of Psychiatry*. 2005;162(3):619-20.
- 346 14. Slomp FM, Bara TS, Picharski GL, Cordeiro ML. Association of cigarette smoking with anxiety,  
347 depression, and suicidal ideation among Brazilian adolescents. *Neuropsychiatric disease and treatment*.  
348 2019:2799-808.
- 349 15. Fotti SA, Katz LY, Afifi TO, Cox BJ. The associations between peer and parental relationships and  
350 suicidal behaviours in early adolescents. *The Canadian Journal of Psychiatry*. 2006;51(11):698-703.
- 351 16. Kandel DB, Raveis VH, Davies M. Suicidal ideation in adolescence: Depression, substance use,  
352 and other risk factors. *Journal of Youth and Adolescence*. 1991;20(2):289-309.
- 353 17. King RA, Schwab-Stone M, Flisher AJ, Greenwald S, Kramer RA, Goodman SH, et al. Psychosocial  
354 and risk behavior correlates of youth suicide attempts and suicidal ideation. *Journal of the American*  
355 *academy of child & adolescent psychiatry*. 2001;40(7):837-46.
- 356 18. Miller E, McCullough C, Johnson JG. The association of family risk factors with suicidality among  
357 adolescent primary care patients. *Journal of Family Violence*. 2012;27:523-9.

- 358 19. Pandey AR, Bista B, Dhungana RR, Aryal KK, Chalise B, Dhimal M. Factors associated with suicidal  
359 ideation and suicidal attempts among adolescent students in Nepal: Findings from Global School-based  
360 Students Health Survey. *PloS one*. 2019;14(4):e0210383.
- 361 20. Peprah P, Asare BY-A, Nyadanu SD, Asare-Doku W, Adu C, Peprah J, et al. Bullying victimization  
362 and suicidal behavior among adolescents in 28 countries and territories: a moderated mediation model.  
363 *Journal of adolescent health*. 2023;73(1):110-7.
- 364 21. Singh V, Behmani RK. Parenting style and adolescent suicide ideation: A review. *Parenting*.  
365 2018;3(2):1245-52.
- 366 22. Gau SS-F, Chen Y-Y, Tsai F-J, Lee M-B, Chiu Y-N, Soong W-T, et al. Risk factors for suicide in  
367 Taiwanese college students. *Journal of American College Health*. 2008;57(2):135-42.
- 368 23. Wagner BM, Silverman MAC, Martin CE. Family factors in youth suicidal behaviors. *American*  
369 *Behavioral Scientist*. 2003;46(9):1171-91.

370
